# Supplementary material for: Evolutionary Origin of Insulin-Degrading Enzyme and Its Subcellular Localization and Secretion Mechanism: A Study in Microglial Cells
Source: MDPI journal article supplement (doi:10.3390/cells11020227), 2022-01-11
Supplement: s1 [file s1]

## Supplementary Materials

# Evolutionary Origin of Insulin-Degrading Enzyme and Its Subcellular Localization and Secretion Mechanism: A Study in Microglial Cells

Miriam Corraliza-Gómez <sup>1,\*</sup>, Concepción Lillo <sup>2,3</sup>, Irene Cózar-Castellano <sup>1,4</sup>, Eduardo Arranz <sup>1</sup>, Diego Sanchez <sup>1</sup> and Maria D. Ganfornina <sup>1</sup>

<sup>1</sup> Excellence Unit, Instituto de Biología y Genética Molecular, University of Valladolid-CSIC, 47003 Valladolid, Spain; irene.cozar@uva.es (I.C.-C.); earranz@uva.es (E.A.); lazarill@ibgm.uva.es (D.S.); opabinia@ibgm.uva.es (M.D.G.)

<sup>2</sup> Instituto de Neurociencias de Castilla y León (INCYL), University of Salamanca, 37007 Salamanca, Spain; conlillo@usal.es

<sup>3</sup> Hospital Virgen de la Vega-Instituto de Investigación Biomédica de Salamanca (IBSAL), 37007 Salamanca, Spain

<sup>4</sup> Centro de Investigación Biomédica en Red de Diabetes y Enfermedades Metabólicas Asociadas (CIBERDEM), 28029 Madrid, Spain

\* Correspondence: corraliza@ibgm.uva.es; Tel.: +34-983-184-814

### TABLE OF CONTENTS

#### In .asn file (Supplementary File 1):

|                                                |
|------------------------------------------------|
| File S1: IDE position-specific scoring matrix. |
|------------------------------------------------|

#### In this file (Supplementary File 2):

|                                               |
|-----------------------------------------------|
| Figure S1. Genotyping of IDE-KO mouse colony. |
|-----------------------------------------------|

|                                                                    |
|--------------------------------------------------------------------|
| Figure S2. Structural alignments of clan ME metalloendopeptidases. |
|--------------------------------------------------------------------|

|                                                                          |
|--------------------------------------------------------------------------|
| Figure S3. Gene architecture comparison between 26 IDE and NRD proteins. |
|--------------------------------------------------------------------------|

|                                                 |
|-------------------------------------------------|
| Figure S4. Controls for microscopy experiments. |
|-------------------------------------------------|

|                                                          |
|----------------------------------------------------------|
| Molecular phylogeny data S2: Trees output (text format). |
|----------------------------------------------------------|

#### In Excel file (Supplementary File 3):

|                                       |
|---------------------------------------|
| Table S1: Sequences used in Figure 1. |
|---------------------------------------|

|                                        |
|----------------------------------------|
| Table S2: Sequences used in Figure 2A. |
|----------------------------------------|

|                                        |
|----------------------------------------|
| Table S3: Sequences used in Figure 2C. |
|----------------------------------------|

|                                        |
|----------------------------------------|
| Table S4: Sequences used in Figure 3A. |
|----------------------------------------|

|                                        |
|----------------------------------------|
| Table S5: SignalP predictions results. |
|----------------------------------------|

|                                       |
|---------------------------------------|
| Table S6: SignalP summary per Phylum. |
|---------------------------------------|

|                            |
|----------------------------|
| Table S7: DeepLoc results. |
|----------------------------|

A

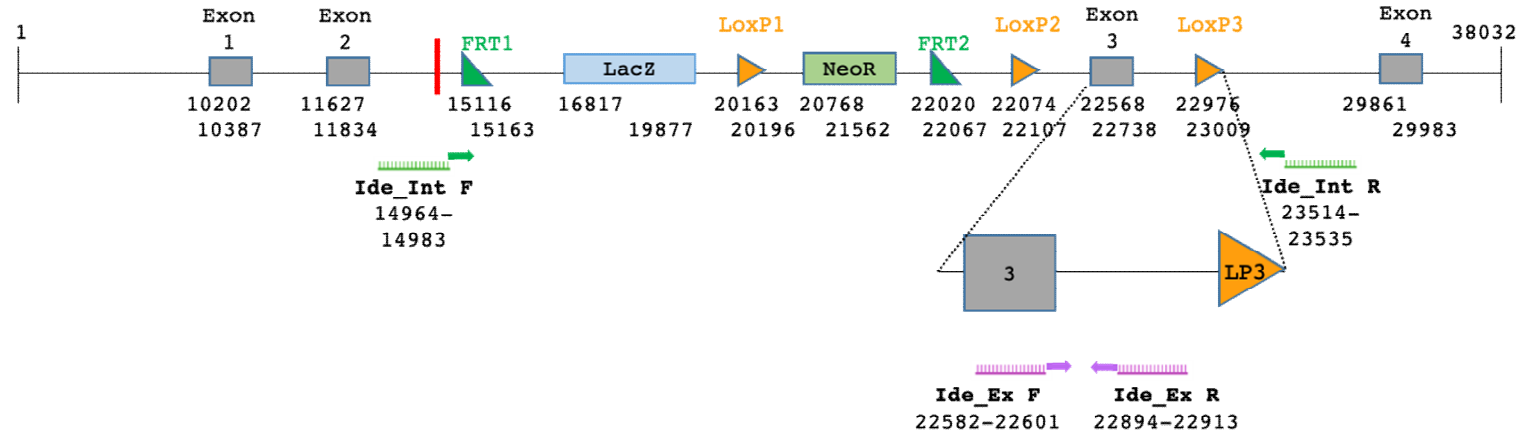

B

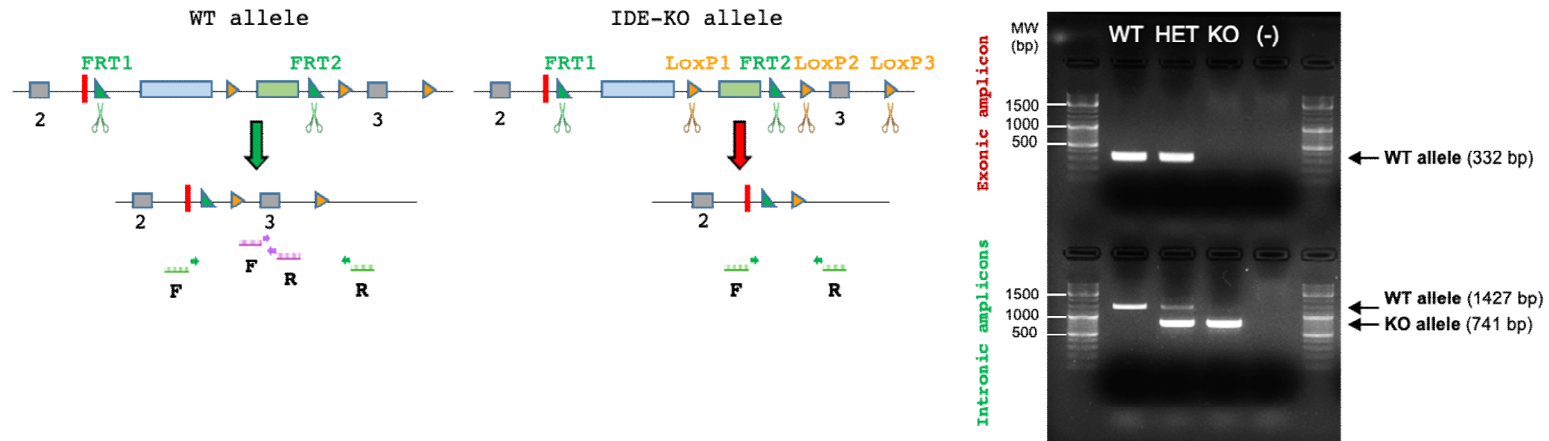

**Figure S1. Genotyping of IDE-KO mouse colony.** **A)** Scheme of the genomic map of mutant allele Ide-KO construct (NCBI GenBank JN963136.1) and the genomic localization of the primers designed to genotype IDE-KO mouse colony. **B)** Genetic structure of the WT and IDE-KO alleles. The WT allele produces both exonic and intronic amplicons, while the IDE-KO allele only generates the intronic amplicon, producing a shorter fragment than the WT one due to removal of exon 3. A representative genotyping result is shown (exonic amplicons in the upper part of the gel; intronic amplicons in the lower).

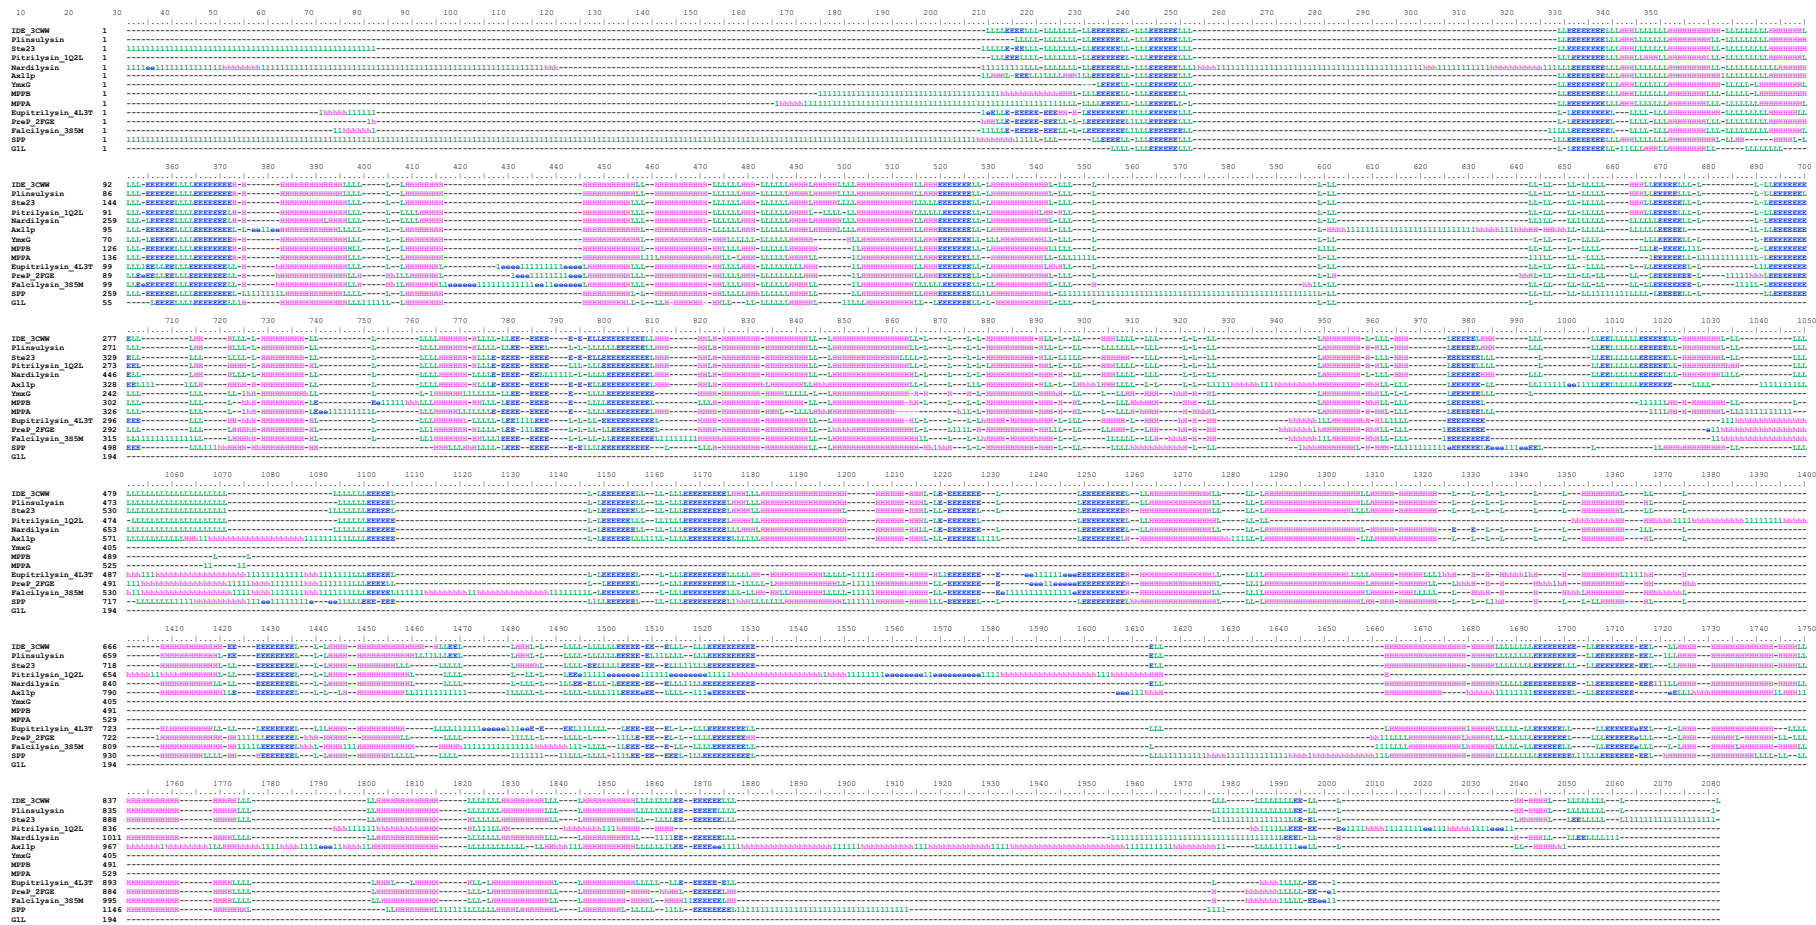

Figure S2. Structural alignments of clan ME metalloendopeptidases. Structural assignments by DSSP, mapped on an underlying sequence alignment, are shown as follows: helix (H/h, in pink), strand (E/e, in blue) and coil (L/l, in green). Uppercase means structurally equivalent positions with human IDE (3CWW) sequence. Lowercase means insertions relative to 3CWW.

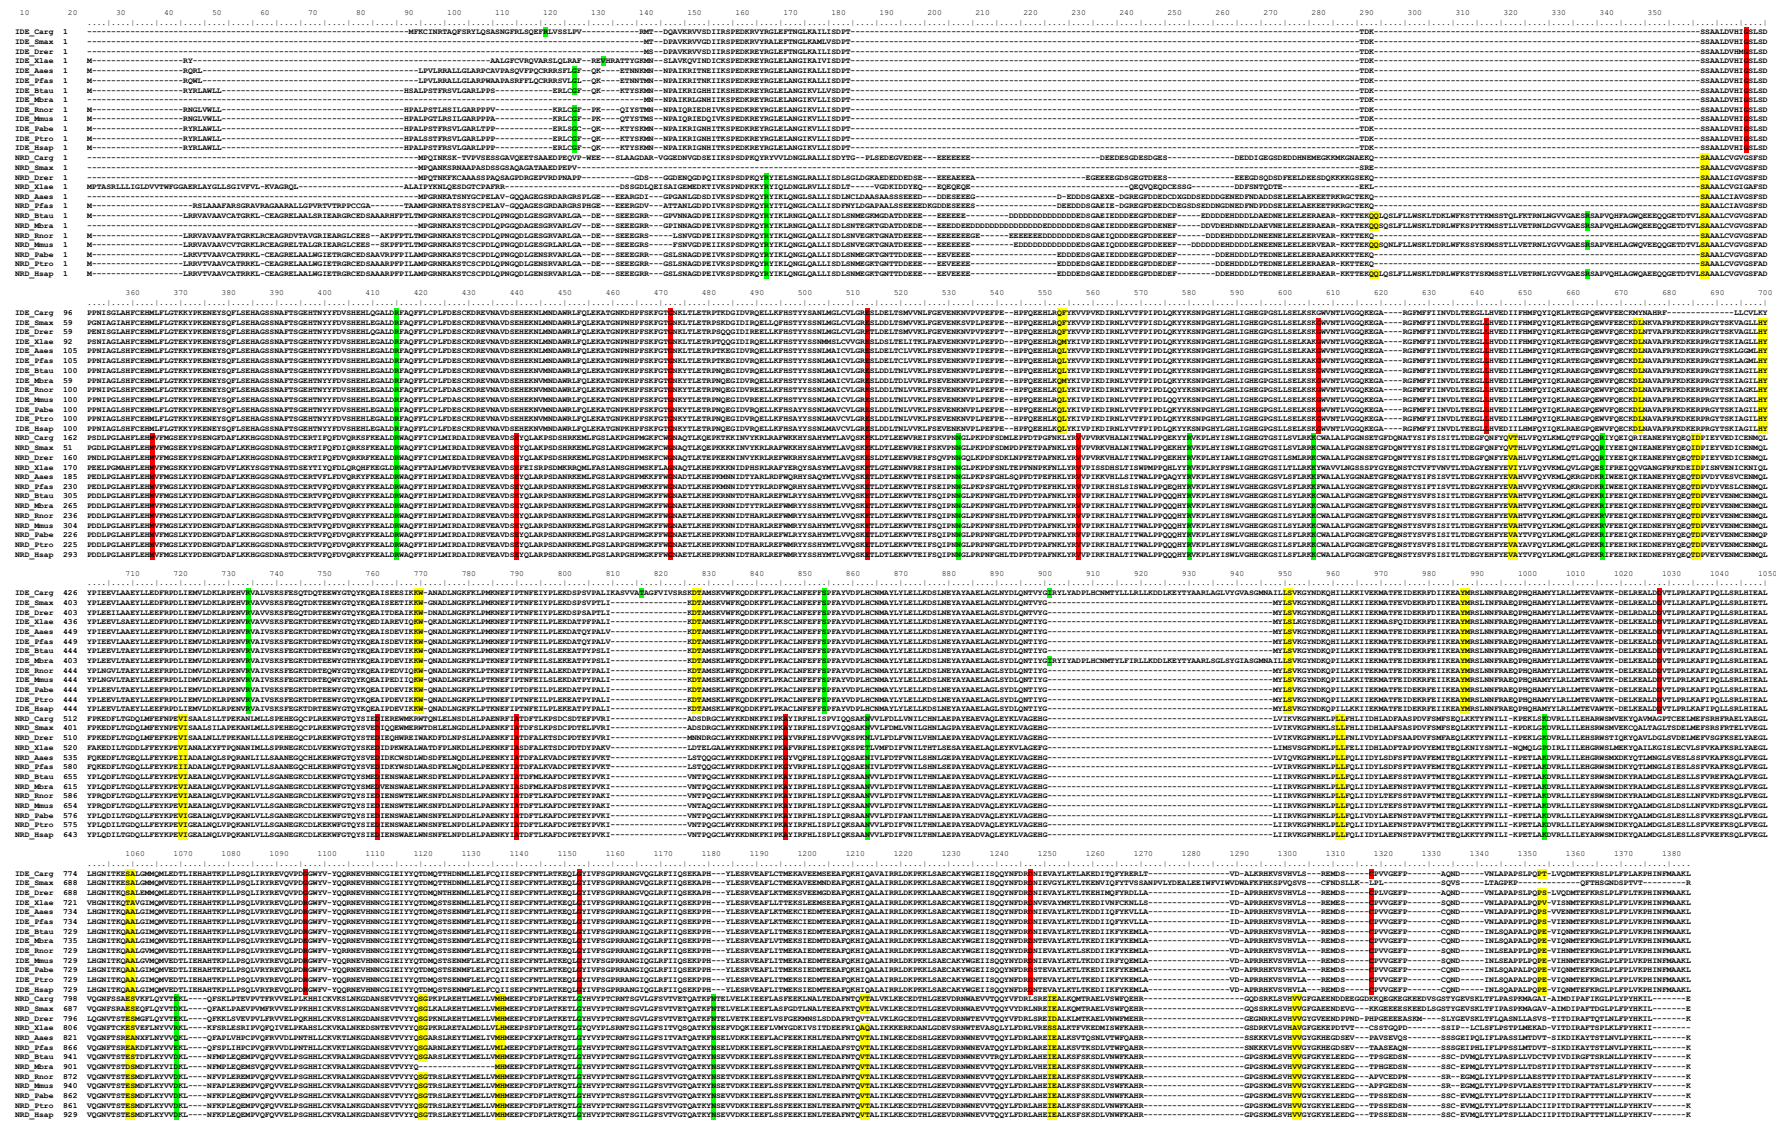

Figure S3. Gene architecture comparison between 26 IDE and NRD proteins. The sequences were retrieved from 13 species of chordates. Introns and their phase (0 = yellow, 1 = red, 2 = green) are depicted on a MSA of protein sequences.

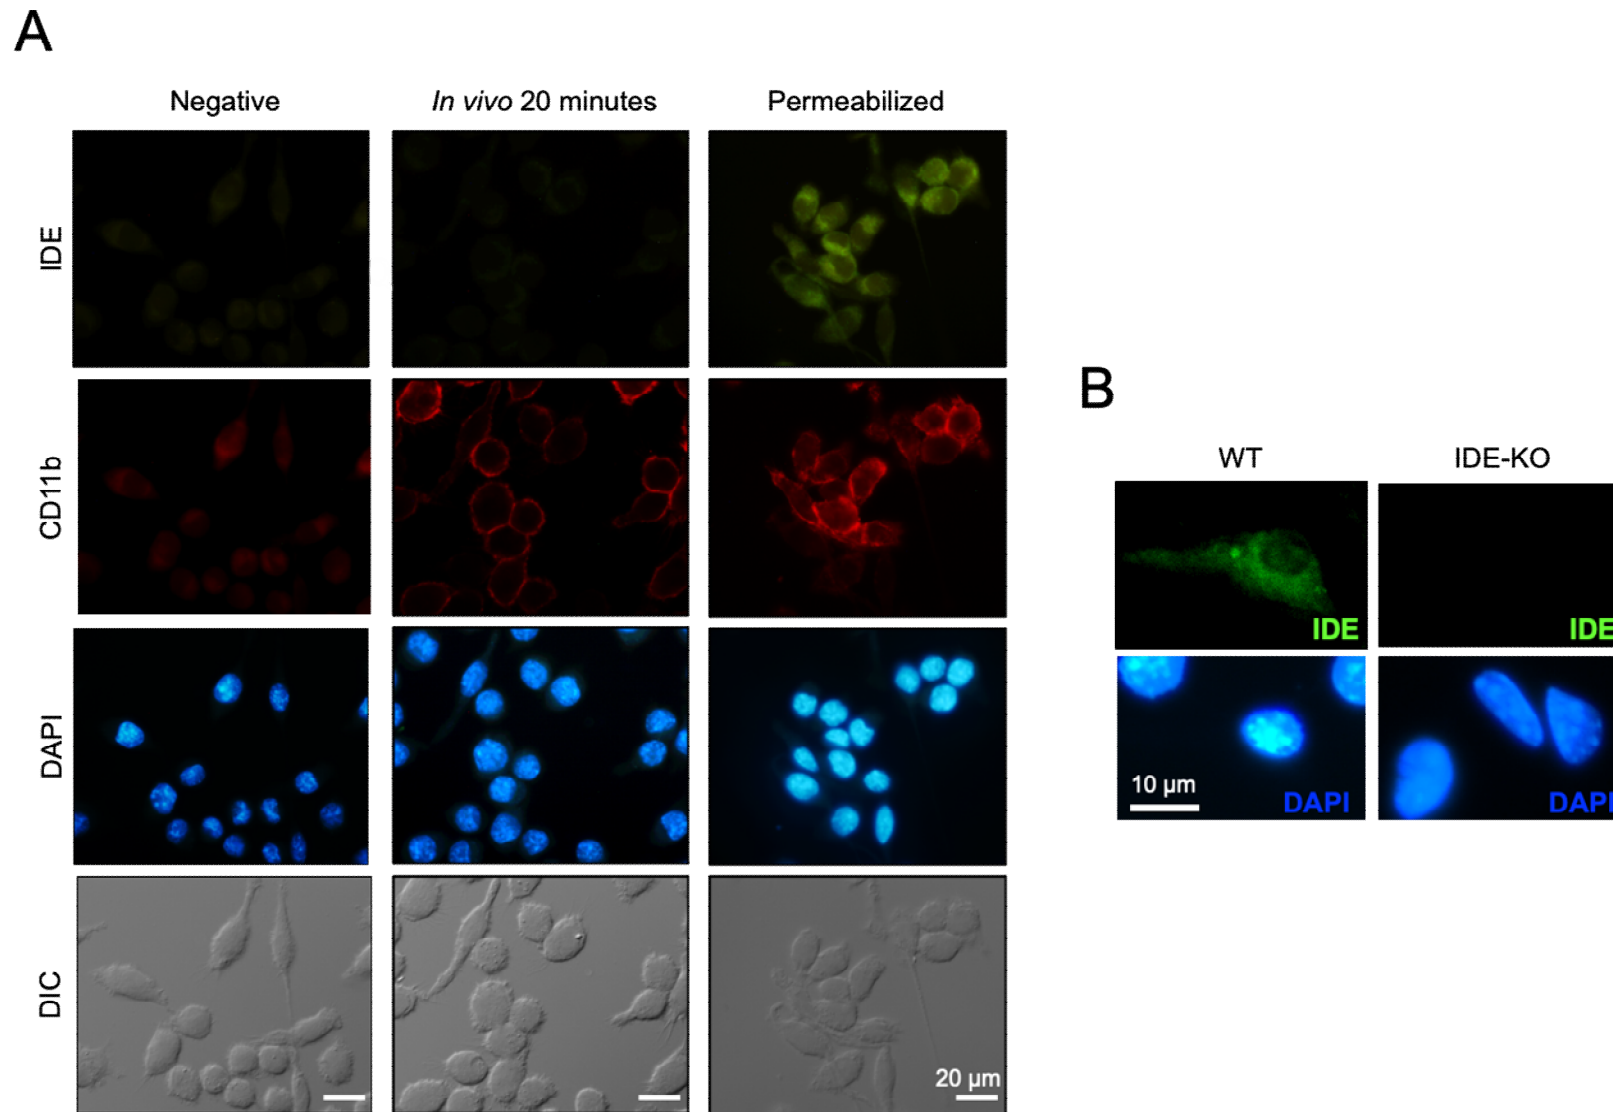

**Figure S4. Controls for microscopy experiments. A)** Double immunolabeling of IDE and CD11b in BV-2 microglial cell line. Negative control: All steps performed, but no primary antibody added. **B)** Validation of the labeling protocol with anti-IDE antibody in WT and IDE-KO microglial cells.

**Molecular phylogeny data S2. Trees output (text format)**

**Figure 1A**

(Eupitriylisin\_Hsap:1.0191103455,(PreP1\_Atha:0.7225082131,Falcilysin\_Pfal:1.3415617952)84:0.2457498546,((MPPA\_Hsap:1.0363378193,(MPPB\_Hsap:0.7195480079,YmxG\_Rpro:1.2491304481)61:0.2537924513)100:1.0639391740,((((NRDC\_Hsap:1.0268046682,((Ste23\_Scer:0.8832602370,IDE\_Hsap:0.5509579495)94:0.1756842058,Plinsulysin\_Slyc:0.7650341070)67:0.1260218911)89:0.2364566254,Pitriylisin\_Ecol:1.3800937785)67:0.2110329985,Axl1p\_Scer:1.7584369669)87:0.4037858439,G1L\_MP44\_Vvir:2.8498386663)82:0.3549218325,SPP\_Atha:1.8855216901)71:0.1808566439)100:1.1295031830);

**Figure 1B**

((((((((3CWWA:9.1,s005A:9.6):7.95,Ste23:18.05):3.516666666666666,1Q2LA:22.86666666666667):5.383333333333333,NRD:27.15):4.21,Axl1p:30.66):5.556666666666667,(((MPPB:19.2,s008A:21.1):5.3,MPPA:17.3):15.53333333333333,SPP:38.33333333333333):0.6833333333333333):5.233333333333333,((4L3TA:23.6,2fgeA:25.1):3.05,3S5MA:21.85):15.8):4.38846153846154,G1L:20.1384615384615);

**Figure 2A**

(IDE\_BosTau:0.0051226676,((IDE1\_HomSap:0.0034152175,((IDE\_MusMus:0.0313582878,((((IDE\_AsaScu:0.0034655968,(((IDE\_AegBen:0.0026783498,IDE\_CeuAer:0.0053617161)94:0.0000023284,(IDE\_ChIAen:0.0008853988,(IDE\_ArdKor:0.0017674945,IDE\_EryMcc:0.0103529279)90:0.0014782163)60:0.0000027158)78:0.0013175698,IDE\_PatFas:0.0074236233)83:0.0018153438,IDE\_CrySou:0.0026377567)91:0.0049848728)100:0.0100945348,IDEa\_AllMis:0.0200561702)79:0.0065752659,IDE\_PlaMeg:0.0636724574)100:0.0105380221,IDE\_VarKom:0.0626664241)97:0.0114959209,(IDE\_XenTro:0.0557440240,(((IDE\_AciRut:0.0283482189,(IDE\_DanRer:0.0309783686,(IDE\_OryMel:0.0454762402,IDE\_ScoMax:0.0619811144)100:0.0164920130)100:0.0162039894)100:0.0149729204,IDE\_PolSen:0.0838444480)100:0.0240385862,(hIDE\_ChiPun:0.0989612859,(((((((IDE\_MytCor:0.3048386029,IDE1\_DimGyr:0.4106404761)94:0.0580096281,(IDE1\_OctVul:0.4255844946,IDE\_HalDiv:0.4904052137)80:0.0317921172)86:0.0537259923,(((IDE\_TriPse:0.5118839273,(IDE\_ToxCan:0.3444612522,(IDE1\_AngCos:0.2258438388,M16\_HaeCon:0.0716814338)100:0.3316412166)100:0.3335359656)100:0.1541703330,((((((((((((Ste23\_ZymBre:0.2636082991,LuxS\_PolCit:0.2806531450)100:0.0753690878,Ste23l\_DelStr:0.2405846164)100:0.0975453823,M16\_MacPha:0.1856175074)99:0.0289537873,FLC2\_VenNas:0.2571988862)100:0.0651601036,(Ste23\_LasPus:0.2316374122,(MEN\_PenCam:0.1907073750,IDE\_BlaDer:0.2406610851)100:0.0859125499)99:0.0358979135)82:0.0322294401,((pMUG\_GolCic:0.2012652891,LuxS\_AceMac:0.1421937153)100:0.0660006894,((IDE\_FusCir:0.1925498958,ZNP\_ColTru:0.1041068861)100:0.0457397370,Ste23\_NeuCra:0.2566786688)100:0.0796120041)100:0.1183254583)100:0.0938286948,MEN\_TryHyb:0.3433919129)97:0.0521271477,NRD\_ArtEnt:0.5232627774)100:0.1811330241,IDE\_WicCif:0.7216300887)70:0.0533710211,(MEN\_ProLac:0.5729010753,MTP\_SchCry:0.7335138471)83:0.0901832623)80:0.0551253095,(((MTE\_JimFla:0.1700590519,IDE\_ChoCuc:0.1035073466,UCC\_PhyBla:0.1368645469)100:0.0992350831)100:0.0683114548,((MTE\_AbsRep:0.2481554085,Ste23\_LicCor:0.1351417306)99:0.0563981733,IDE\_ApoOss:0.2099403183)100:0.1994638424)100:0.0882951418,(MTE\_GigMar:0.2502909208,Ste23\_Rhilrr:0.2072019057)100:0.1126151584)100:0.1387023266,((Ste23\_MalPac:0.4366355957,NRD1\_MoeAnt:0.3629373661)100:0.1389553296,(((LuxS\_LeuCre:0.1825182270,IDE\_RhoMuc:0.2504483501)100:0.2467553086,IDE\_PucGra:0.6287050649)100:0.0837716825,IDE\_Wallch:0.6526696218)97:0.0521433822,((IDE\_CryDep:0.3020285088,AFA\_TriAsa:0.3669052913)100:0.3515443791,(((Ste23\_MonRor:0.3043459295,IDE\_MycKen:0.3890260539)100:0.2301031385,LuxS\_GauMor:0.4306182631)100:0.0898043556,IDE\_DacPri:0.6183727108)100:0.2098542816)100:0.0836742039)98:0.0225659292)100:0.0853257642)83:0.0536975162)99:0.1109425148,((LuxS\_GonPro:0.7415897449,IDE\_RhiGlo:0.6823956191)98:0.0564923681,Ste23\_NeoCal:0.9673084189)98:0.0699958548)100:0.1815729746,(((ZNP\_RapSub:0.7049045752,IDE1\_ChIPri:0.6685418142)99:0.1128078234,((pIDE\_ZosMar:0.2465531509,(ZNP\_ApoShe:0.2047536212,(((IDEf\_ArtAnn:0.1734506251,((IDE1\_OleEur:0.0750912173,IDE\_StrAsi:0.1440737846)99:0.0336077248,IDE1\_NicAtt:0.1245654407,Unn\_CofCan:0.2653481687)98:0.0163901225)99:0.0228459232)99:0.0176323222,IDE1\_ActChi:0.1021235446)100:0.0375081444,((ZNP\_TriWil:0.1073767710,IDE\_TheCac:0.0849

450149)96:0.0157788316,(((PQQ\_TreOri:0.1014050513,ZNP\_PyrUss:0.1350511488)98:0.0218300852,(IDeI\_CucMel:0.1801960020,IDeF\_AraTha:0.2914679730)86:0.0229846502)73:0.0055626689,(ZNP\_GlySoj:0.1611849710,ZNP\_MorRub:0.0934222868)87:0.0194663974)90:0.0102754064)99:0.0266241984)100:0.0331768692,(M16\_MacCor:0.1063889237,M16\_CinMic:0.1867351904)98:0.0255475139)100:0.0514740206)100:0.0336330655)100:0.0677137972,ZNP\_CarLit:0.1927486289)100:0.4276682545)100:0.2640076833,(((Unn\_VitBra:0.5612820922,IDE\_FisSol:0.6602956553)100:0.2951627207,M16\_EmiHux:1.0467366039)98:0.1429274278,(SCG\_5\_TryCru:0.4663741098,IDE\_StrCul:0.4277513511)100:1.3179111860)93:0.1234974721,((((((((M16\_EurArc:0.7311566389,IDEf\_HahCcb:0.5201519002)100:0.1092684329,(IDEf\_ParF74:0.7121022762,IDEf\_PseHs1:0.7058773128)83:0.1385632332)74:0.0748062301,M16\_AciBac:0.7949596430)58:0.0670198277,((IDEf\_MetSed:0.1859299784,M16\_MetSp:0.1951217040)100:0.4865370832,M16\_AmpJap:0.7200201209)77:0.1247849107)53:0.0307603435,M16\_SpoSp:0.9690011125)91:0.0982993486,(M16\_RhoBac:0.9951106902,((IDEf\_AerVer:0.0401617534,IDEf\_EscCol:0.0404941517)100:0.3950161870,IDEf\_PhoPro:0.4147126321)100:0.4357120485)86:0.1111373506)100:0.2541901383,(((IDEf\_LenBac:0.6919858582,(IDEf\_BurBac:0.5131657699,IDEf\_EreLut:0.3913489649)100:0.2276595411)100:0.1392898668,IDEf\_PlaBac:0.8199349111)100:0.2369700598,(IDEf\_Sar324:0.5771000350,M16\_DelBac:0.9539942461)74:0.1456334305)100:0.1927851860,((M16\_ChIBac:0.4625706513,PR3\_ChIBac:0.3920691262)98:0.1203595999,IDE\_ParAca:0.3877574225)100:0.9230023459)97:0.1448330849)91:0.0855100103,(((IDE\_TetThe:0.8598935173,LuxS\_PsePer:0.6517300834)75:0.0988470956,Unn\_ParTet:0.7436487685)99:0.1806733886,IDE\_StyLem:1.0750269274)100:0.2099458259,(((IDE\_MimVir:0.6530758533,ZNP\_HomVir:0.6590510677)97:0.1173967882,ZNP\_IndVir:0.8759103648)100:0.3513790410,IDE\_YasVir:1.1437080081)100:0.2841438849)80:0.1190722389,((TLN\_1\_BesBes:0.1437497284,M16\_NeoCan:0.1418117397)100:0.9206333955,((IDE\_EimBru:0.0450761344,SDP\_EimBov:0.0837449309)100:1.4453643490,IDEI\_CryUbi:1.2952873699)78:0.1597229290)73:0.0747446714,IDE\_CavFas:1.2535077945)79:0.1100223603)97:0.1020066718)96:0.0771555038,(IDE\_PlaFun:0.9837451678,(((((((NRD\_CamDro:0.0316893968,NRD2\_LynPar:0.0130652211)100:0.0021151166,NRD\_RhiFer:0.0124975531)100:0.0044022032,NRDb\_HomSap:0.0209530555)99:0.0067473174,NRD1\_MusMus:0.0291652791)100:0.0944518860,(((NRD\_PatFas:0.0268517849,NRD\_LepDis:0.0112978142)100:0.0068812544,NRD\_LonStr:0.0453960813)66:0.0057377716,NRD\_GalGal:0.0298394151)100:0.0311004864,(NRD\_AllMis:0.0306384839,RhoG\_PlaMeg:0.0377130677)100:0.0141987692)100:0.1056127282)100:0.0914859042,NRD\_XenLae:0.3936035895)71:0.0254997998,hNRD\_ChiPun:0.2391344620)73:0.0450646577,((NRD\_NotFur:0.0632070864,NRD\_ColLuc:0.0585101020)100:0.1197757228,((NRD\_SciFor:0.0352350585,NRD\_PolSen:0.2645028203)100:0.0403579785,NRDb\_DanRer:0.2206498534)93:0.0271377043)95:0.0401397630)100:0.2951075589,(NRD1\_BugNer:0.5663014041,NRDI\_DimGyr:0.7013227566)67:0.1230932106)36:0.0416530461,(NRDI\_FraOcc:0.6206292773,NRD\_PenVan:0.5089705391)100:0.2086979909)94:0.0822232253,NRD\_PhaMam:0.8009536657)100:0.2759542798,(((MMS19\_PhyNic:0.0673762565,NRD\_PhyPal:0.0558328535)100:0.3661782536,NRD\_ThrCla:0.5230668087)100:0.4141157080,NRD\_NanGad:0.9473360677)99:0.1188289711,(((LuxS\_DunSal:0.4569396120,NRDI\_ScePab:0.4128745854)100:0.1294165072,IDE\_TreA12:0.3704535032)100:0.3170276870,((NRD\_CocNuc:0.1330166279,IDE\_AnaCom:0.1283853082)100:0.0812437054,(IDE\_ThaTha:0.1702442660,((NRD\_SalSpl:0.1325880807,NRDI\_DorHyg:0.1612904993)100:0.0853565879,((NRD\_PopAlb:0.1434608017,IDE\_MorNot:0.1352435404)81:0.0236158553,M16\_CepFol:0.1516805645)100:0.0396004382)100:0.0923959918)84:0.0291052159)100:0.5339373245)100:0.1203256466)98:0.1061676362,Ste23\_ChrTob:1.1412515215)23:0.0361023962)59:0.0413755848,(pUnn\_MonBre:1.0222720014,NRD\_SymMic:1.0407150920)73:0.1784336278)100:0.1535961810)91:0.0948116048)58:0.0279496915)86:0.0302141331)35:0.0388533246,((PEP\_AcaCas:0.8315718852,(((pIDE\_AlBCan:0.5899687093,M16\_PhyInf:0.2659754606)100:0.1745354757,M16A\_ThrCla:0.4782232478)100:0.1181553665,IDE\_PhyNic:0.7167402676)100:0.1742638415,IDE\_HonFer:0.7615154022)100:0.0761179662,M16\_FraCyl:0.9664542316)70:0.0499773267)61:0.0422480655,(((IDE\_PorPur:0.5634884803,IDE\_GraCho:0.7612337627)100:0.1744180192,IDE\_GalSul:1.0155876839)94:0.1048641132,(IDE\_ChrTob:0.8130553830,(((IDE\_SymMic:0.8247152460,PR3\_FisSol:0.9375198207)91:0.0753722524,IDEI\_EctSil:0.5966752415)96:0.0819600947,IDE\_NanGad:0.5883543955)100:0.1989019565)99:0.1146092033)58:0.0534097644)38:0.0507221017)94:0.0692598419)100:0.1005150527,(IDE\_EchGra:0.6923656109,(M16\_OpiViv:0.3180740671,IDE\_FasHep:0.2274878023)100:0.3499346043)100:0.3266503389)100:0.0757560612)100:0.0657598089,IDE\_BugNer:0.6656908232)87:0.0355440269,(IDE\_HypDuj:0.6169115849,IDE\_BraPli:0.7040571493)78:0.0990216891)68:0.0332104934)69:0.0155027561,IDE\_ArgBru:0.4778894759)67:0.0108396707,(((IDEI\_DapMag:0.4143013192,(IDE\_ArmVul:0.2490647563,M16\_TriLon:0.4124610621)100:0.1321984538)87:0.0493989981,(((IDE\_ZooNev:0.1265308793,IDEI\_TimBar:0.1851098776)100:0.0719029170,(IDE\_TriCas:0.2750326810,IDE\_OocBir:0.4147839673)100:0.0726823343)99:0.0529233415,IDEp\_PedHum:0.512

4789594)97:0.0540882428,IDE\_PapXut:0.5977617159)66:0.0515961024)63:0.0470704695,(IDE\_TigJap:0.5370540392,(((IDE\_DroMel:0.5536639849,IDEX1\_AphCra:  
0.6441393840)70:0.0515924443,IDE\_OrcCin:0.6305270096)67:0.0542715637,IDEI\_DarSte:0.5482961125)63:0.0389488606)63:0.0395488930)76:0.0632258547)100  
:0.0725781289,IDEp\_ApoJap:0.4023461561)88:0.0349000105,IDE\_PhaMam:0.4867649760)90:0.0394435022,IDE\_ExaDia:0.4183929176)100:0.1586562018)100:0.0  
361790093)100:0.0327046975)100:0.0237141628)100:0.0310299860)100:0.0079273644,IDE\_TupChi:0.0234432889)87:0.0021787377)88:0.0008668446,IDE\_PteAle  
:0.0137141318)88:0.0008547083,IDE\_CanLup:0.0059361587);



**Figure 2C**

(IDE\_Ptro:0.0010037341,IDE\_Hsap:0.0000020519,((IDE\_Rnor:0.0053803549,IDE\_Mmus:0.0077751287)100:0.0364460367,(IDE\_Xlae:0.0600759991,(IDE\_Drer:0.0558410017,(IDE\_Pmam:0.4529526827,((IDE\_Dmel:0.6278166956,IDE\_Cele:0.9864985139)58:0.1276774261,((S23p\_Scer:0.9721498743,IDE\_Atha:1.0959203020)39:0.0941957331,((M16\_Earc:1.0361309585,Pit\_Ecol:1.7984595718)99:0.4331067189,IDE\_Tthe:1.3876230862)62:0.2059447514)65:0.1389267330)98:0.1495937229)100:0.3299282783)95:0.0396513328)100:0.0506563962)84:0.0078443214);

**Figure 3A**

(IDE\_Carg:0.0560928078,IDE\_Smax:0.0940596680,(IDE\_Drer:0.0340974777,((IDE\_Xlae:0.0702827827,(((NRD\_Carg:0.0695766729,NRD\_Smax:0.0655395338)100:0.1543387321,NRD\_Drer:0.1077816996)98:0.2002996826,((NRD\_Aaes:0.0522437226,NRD\_Pfas:0.0306480503)100:0.1999932787,(((NRD\_Btau:0.0242722775,NRD\_Mbra:0.0367874729)80:0.0129985688,(NRD\_Rnor:0.0158058973,NRD\_Mmus:0.0084409695)100:0.0440444788)155:0.0056752454,(NRD\_Pabe:0.0075305581,(NRD\_Ptro:0.0009368834,NRD\_Hsap:0.0008994022)91:0.0017949972)99:0.0203317977)99:0.1087087770)98:0.1008993581)95:0.2327388422,NRD\_Xlae:0.3944081518)100:3.1360224120)53:0.0162582345,((IDE\_Aaes:0.0057137672,IDE\_Pfas:0.0089186239)100:0.0383130744,(IDE\_Btau:0.0064440043,((IDE\_Mbra:0.0143381106,(IDE\_Pabe:0.0072519099,(IDE\_Ptro:0.0012044661,IDE\_Hsap:0.0000027819)68:0.0000027820)71:0.0058399812)35:0.0014001227,(IDE\_Rnor:0.0072539338,IDE\_Mmus:0.0084809501)99:0.0469688014)29:0.0015418635)63:0.0482373180)62:0.0296454358)100:0.0781553957)93:0.0247770105);
